# Supplementary material for: Fabrication and Characterization of Porous PEGDA Hydrogels for Articular Cartilage Regeneration
Source: Preprints.org preprint supplement (doi:10.20944/preprints202404.1210.v1), 2024-04-18
Supplement: Supplementary file 1 [file supplementary]

Supplementary Information

Fabrication and Characterization of Porous PEGDA Hydrogels for Articular Cartilage Regeneration

Silvia Gonella1,2,#, Margarida F. Domingues1,2,#, Filipe Miguel1,2, Carla S. Moura3,4, Carlos A.V. Rodrigues1,2, Frederico Castelo Ferreira1,2 and João C. Silva1,2,*


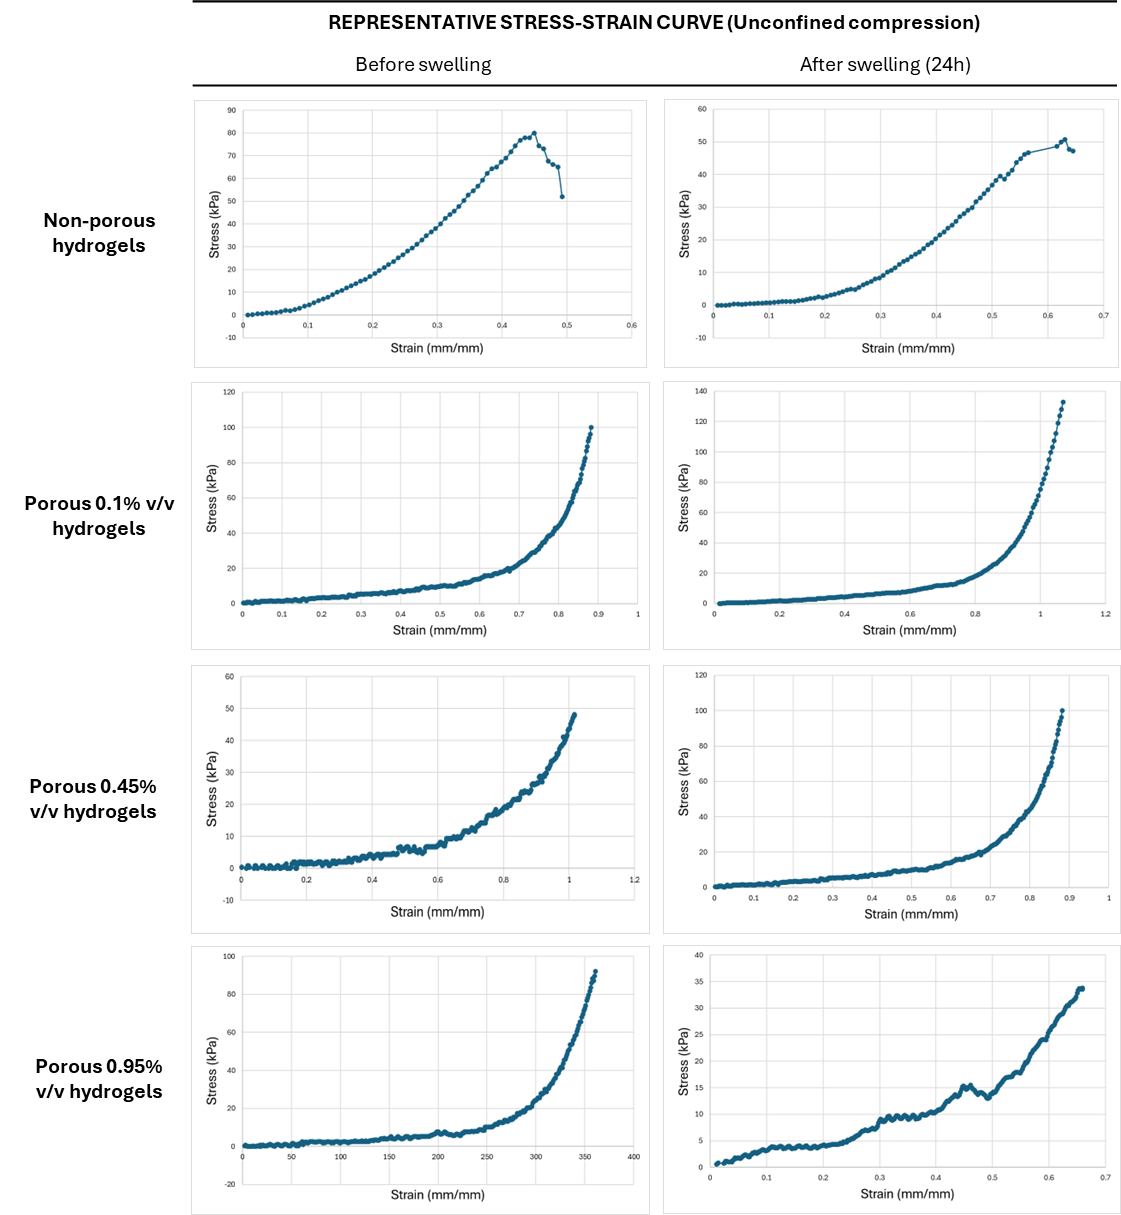


**Figure S1** – Representative Stress-Strain Curve for an unconfined compression test for 3 conditions
of non-porous hydrogels with 0.95% v/v photoinitiator and porous hydrogels with 0.1%, 0.45% or 0.95% v/v photoinitiator concentration, after fabrication and after swelling for 24h.


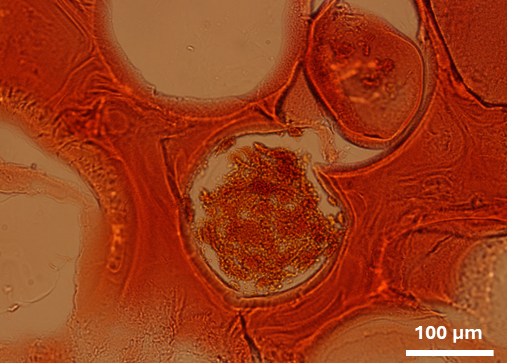


**Figure S2** – Safranin-O staining on a histological section of the 3D porous PEGDA scaffold seeded with
MSC aggregates. Staining was performed after 21 Days of culture in presence of a chondrogenic medium.
